# Supplementary material for: Grinding Beads Influence Microbial DNA Extraction from Organic-Rich Sub-Seafloor Sediment
Source: MDPI journal article supplement (doi:10.3390/microorganisms10122505), 2022-12-18
Supplement: s1 [file s1]

# Supplementary Materials for

## **Grinding Beads Influence Microbial DNA Extraction from Organic-Rich Sub-Sea-floor Sediment**

Jingjing Niu <sup>1,†</sup>, Hong Chen <sup>1,†</sup>, Lanlan Cai <sup>2</sup>, Maoqiu He <sup>3</sup>, Rui Zhang <sup>4</sup> and Long Wang <sup>1,5,\*</sup>

<sup>1</sup> State Key Laboratory of Marine Environmental Science, Fujian Key Laboratory of Marine Carbon Sequestration, College of Ocean and Earth Sciences, Xiamen University, Xiamen 361102, China

<sup>2</sup> Department of Ocean Science, The Hong Kong University of Science and Technology, Hong Kong, China

<sup>3</sup> Fishery College, Zhejiang Ocean University, Zhoushan 316022, China

<sup>4</sup> Institute for Advanced Study, Shenzhen University, Shenzhen 518061, China

<sup>5</sup> Southern Marine Science and Engineering Guangdong Laboratory (Zhuhai), Zhuhai 519080, China

\* Correspondence: kodragon@xmu.edu.cn

† These authors contributed equally to this work.

### **This file includes:**

Figures S1–S4

Tables S1–S3

## Supplementary Materials

**Table S1. Microbial abundance, physical, and chemical properties of sediment samples.**

| Sample1   | Depth<br>(mbsf) | Prokaryotic<br>Abundance<br>(cells/cm <sup>3</sup> ) | Water Content,<br>Wet Mass (%) | Density,<br>Wet Bulk<br>(g/cm <sup>3</sup> ) | Grain<br>Density<br>(g/cm <sup>3</sup> ) | Fractional<br>Porosity | Void<br>Ratio | TOC<br>(wt%) | pH   | Salinity | NH <sub>4</sub> <sup>+</sup><br>(mM) | SO <sub>4</sub> <sup>2-</sup><br>(mM) | PO <sub>4</sub> <sup>3-</sup><br>(mM) |
|-----------|-----------------|------------------------------------------------------|--------------------------------|----------------------------------------------|------------------------------------------|------------------------|---------------|--------------|------|----------|--------------------------------------|---------------------------------------|---------------------------------------|
| M0059E1-1 | 0.83            | $9.86 \times 10^8$                                   | 0.824                          | 1.140                                        | 2.440                                    | 0.918                  | 11.195        | 5.445        | 7.70 | 26.96    | 5.90                                 | 0.07                                  | 1.37                                  |
| M0059E3-1 | 7.21            | $1.16 \times 10^9$                                   | 0.762                          | 1.176                                        | 2.245                                    | 0.875                  | 7.032         | 7.400        | 7.00 | 31.81    | 19.47                                | 0.03                                  | 1.81                                  |
| M0059E7-2 | 21.82           | $8.73 \times 10^8$                                   | 0.645                          | 1.287                                        | 2.413                                    | 0.811                  | 4.284         | 5.445        | 7.72 | 32.15    | 36.99                                | 0.03                                  | 1.70                                  |
| M0065C2-1 | 2.84            | $6.21 \times 10^8$                                   | 0.651                          | 1.298                                        | 2.586                                    | 0.825                  | 4.708         | /            | 7.73 | 16.40    | 4.13                                 | 0.03                                  | 0.44                                  |
| M0065C3-1 | 6.47            | $6.89 \times 10^8$                                   | 0.629                          | 1.319                                        | 2.579                                    | 0.810                  | 4.277         | 4.119        | 7.84 | 15.80    | 4.32                                 | 0.01                                  | 0.34                                  |
| M0065C4-1 | 10.12           | $2.67 \times 10^8$                                   | 0.572                          | 1.436                                        | 3.105                                    | 0.802                  | 4.050         | 2.832        | 7.45 | 13.90    | 3.30                                 | 0.1                                   | 0.09                                  |
| M0063E1-2 | 2.43            | $9.66 \times 10^8$                                   | /                              | /                                            | /                                        | /                      | /             | /            | 7.51 | 11.80    | 2.13                                 | 0.04                                  | 0.32                                  |
| M0063E3-1 | 4.30            | $7.57 \times 10^9$                                   | 0.690                          | 1.272                                        | 2.749                                    | 0.856                  | 5.967         | /            | 7.86 | 13.00    | 3.90                                 | 0.12                                  | 0.89                                  |
| M0063E5-2 | 9.50            | $4.60 \times 10^8$                                   | 0.698                          | 1.251                                        | 2.561                                    | 0.852                  | 5.767         | 1.849        | 7.87 | 14.50    | 4.99                                 | 0.05                                  | 0.90                                  |

Abbreviation: mbsf, meters below seafloor. Data from <https://doi.org/10.1594/PANGAEA.838369> (accessed on 6 November 2022).

**Table S2. Read numbers of 16S rRNA genes of microbial communities obtained using different groups of beads for lysis extraction.**

| Sample     | Raw Sequences | Sample     | Raw Sequences | Sample     | Raw Sequences |
|------------|---------------|------------|---------------|------------|---------------|
| M0059E1-1A | 45155         | M0065C2-1A | 134183        | M0063E1-2A | 48628         |
| M0059E1-1B | 80500         | M0065C2-1B | 121439        | M0063E1-2B | 50220         |
| M0059E1-1C | 48829         | M0065C2-1C | 111536        | M0063E1-2C | 75283         |
| M0059E1-1D | 52758         | M0065C2-1D | 134557        | M0063E1-2D | 79679         |
| M0059E3-1A | 46308         | M0065C3-1A | 55763         | M0063E3-1A | 45833         |
| M0059E3-1B | 48596         | M0065C3-1B | 52485         | M0063E3-1B | 41339         |
| M0059E3-1C | 41698         | M0065C3-1C | 93882         | M0063E3-1C | 115125        |
| M0059E3-1D | 85775         | M0065C3-1D | 40738         | M0063E3-1D | 104255        |
| M0059E7-2A | 64892         | M0065C4-1A | 82807         | M0063E5-2A | 50737         |
| M0059E7-2B | 44699         | M0065C4-1B | 52408         | M0063E5-2B | 79164         |
| M0059E7-2C | 72565         | M0065C4-1C | 42427         | M0063E5-2C | 84265         |
| M0059E7-2D | 79656         | M0065C4-1D | 45439         | M0063E5-2D | 81295         |

**Table S3. Alpha diversity indices based on DADA2.**

| Sample     | Chao-1 Index | Shannon Index |
|------------|--------------|---------------|
| M0059E1-1A | 360.10       | 5.550         |
| M0059E1-1B | 673.00       | 6.183         |
| M0059E1-1C | 415.10       | 5.684         |
| M0059E1-1D | 461.50       | 5.760         |
| M0059E3-1A | 263.40       | 5.290         |
| M0059E3-1B | 271.80       | 5.281         |
| M0059E3-1C | 228.10       | 5.104         |
| M0059E3-1D | 401.90       | 5.642         |
| M0059E7-2A | 297.20       | 5.333         |
| M0059E7-2B | 219.30       | 5.077         |
| M0059E7-2C | 376.00       | 5.526         |
| M0059E7-2D | 314.10       | 5.346         |
| M0065C2-1A | 616.10       | 5.842         |
| M0065C2-1B | 594.50       | 5.923         |
| M0065C2-1C | 545.60       | 5.788         |
| M0065C2-1D | 675.60       | 6.035         |
| M0065C3-1A | 293.00       | 5.190         |
| M0065C3-1B | 276.20       | 5.174         |
| M0065C3-1C | 415.80       | 5.538         |
| M0065C3-1D | 198.20       | 4.902         |
| M0065C4-1A | 330.10       | 5.347         |
| M0065C4-1B | 238.50       | 5.023         |
| M0065C4-1C | 206.10       | 4.988         |
| M0065C4-1D | 190.20       | 4.835         |

**Table S3. Continued.**

| Sample     | Chao-1 Index | Shannon Index |
|------------|--------------|---------------|
| M0063E1-2A | 405.10       | 5.687         |
| M0063E1-2B | 403.60       | 5.726         |
| M0063E1-2C | 545.70       | 6.013         |
| M0063E1-2D | 560.30       | 6.042         |
| M0063E3-1A | 269.10       | 5.227         |
| M0063E3-1B | 249.90       | 5.214         |
| M0063E3-1C | 567.00       | 5.910         |
| M0063E3-1D | 557.90       | 5.906         |
| M0063E5-2A | 341.10       | 5.544         |
| M0063E5-2B | 469.20       | 5.813         |
| M0063E5-2C | 478.80       | 5.821         |
| M0063E5-2D | 467.60       | 5.756         |
| M0063E1-2A | 405.10       | 5.687         |

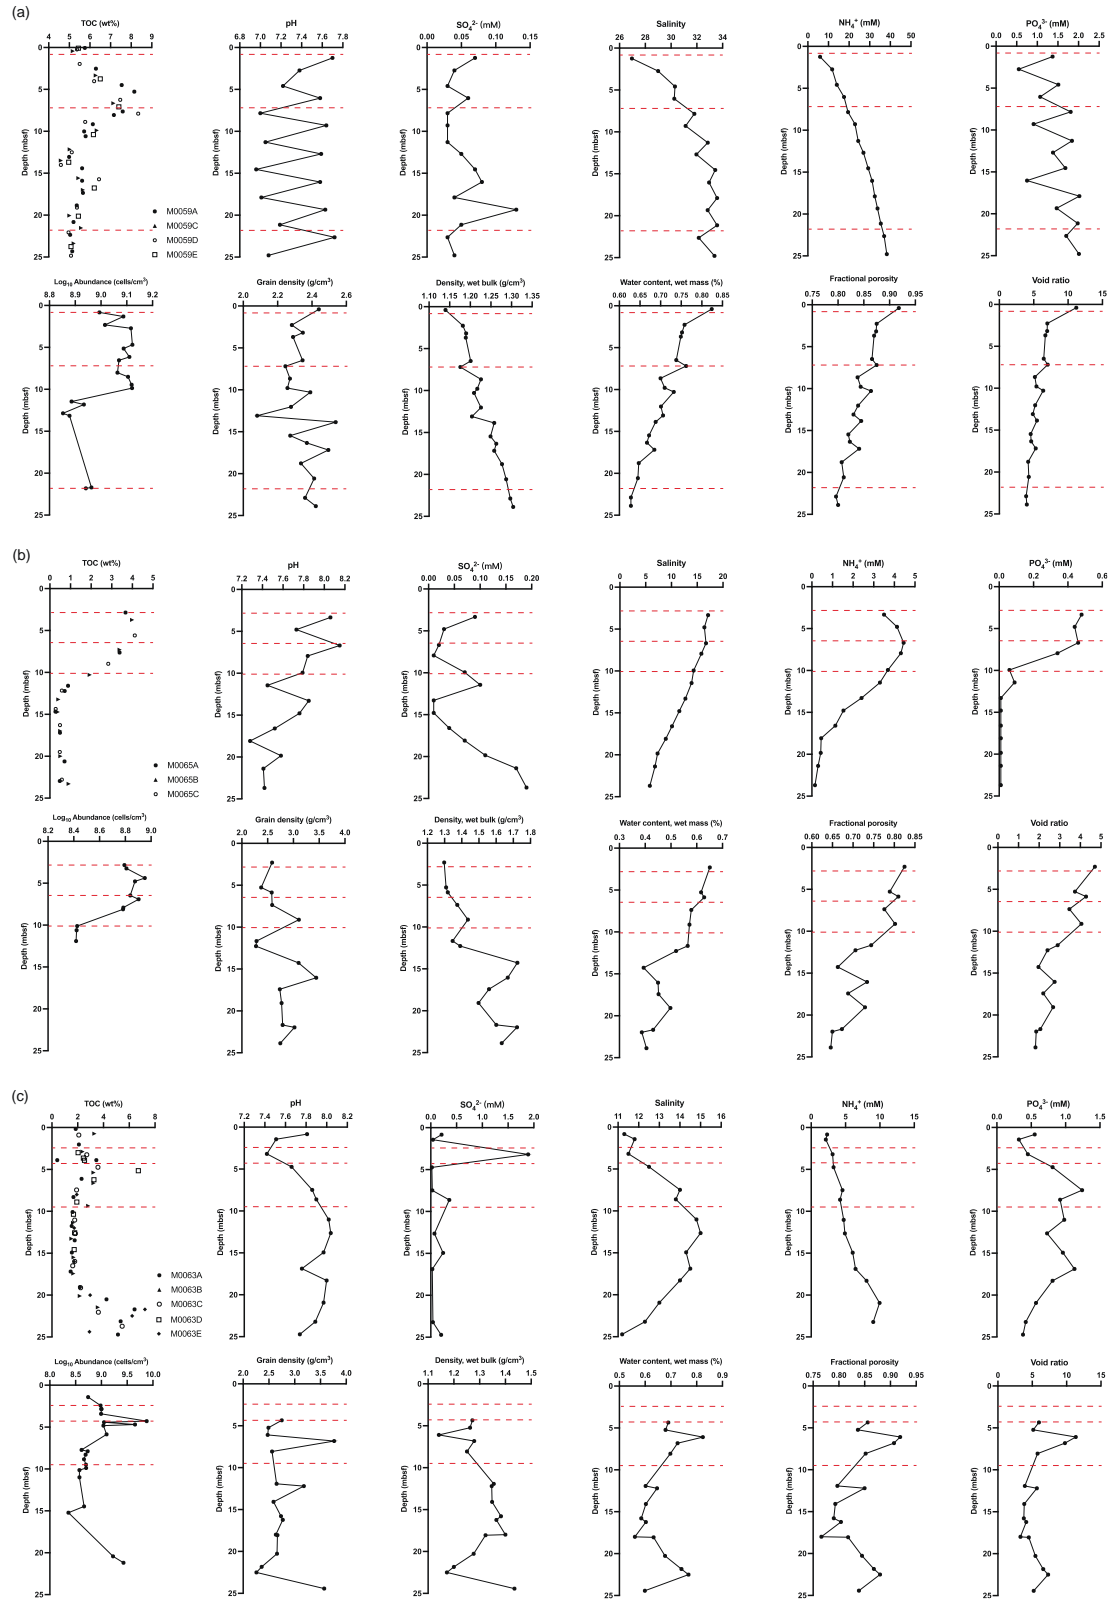

**Figure S1.** The main physicochemical parameters of (a) M0059E, (b) M0065C, and (c) M0063E with changes in the sediment depth. The red dotted line in the plot indicates the deposition depth of the sample used in this study. The physical and chemical parameters of sediment were taken from the IODP Expedition 347 report [1]. The data for prokaryotic abundance were taken from research on viruses in Baltic Sea sub-seafloor sediments [2].

### Cell lysis and protein removal

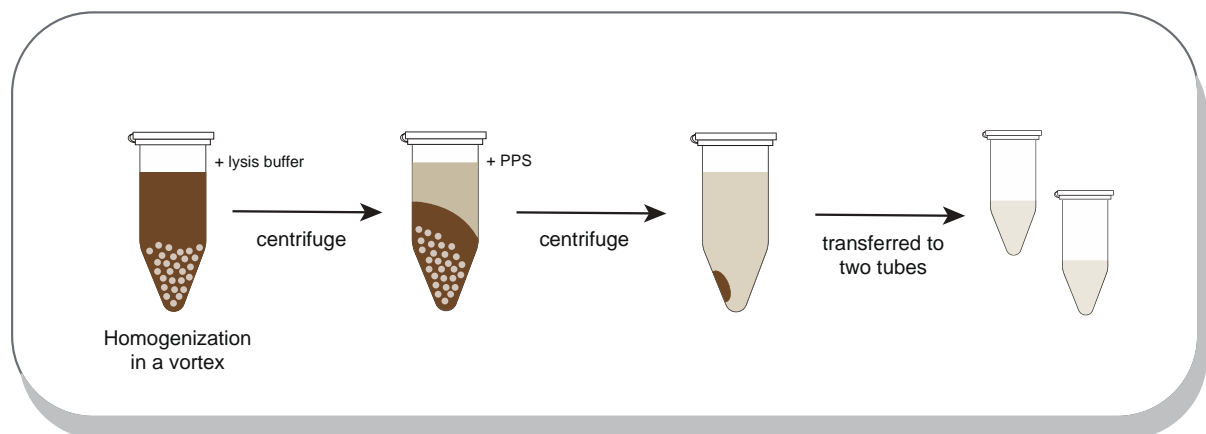

### DNA recovery and purification

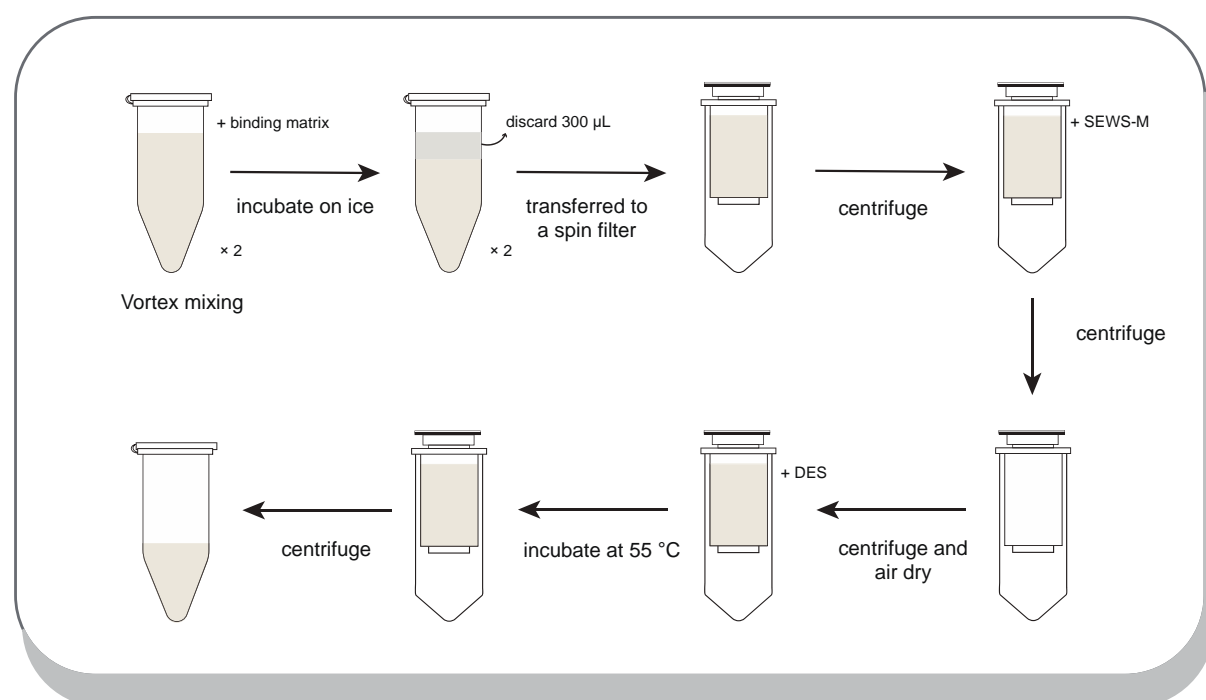

**Figure S2.** A scheme of the DNA extraction process.

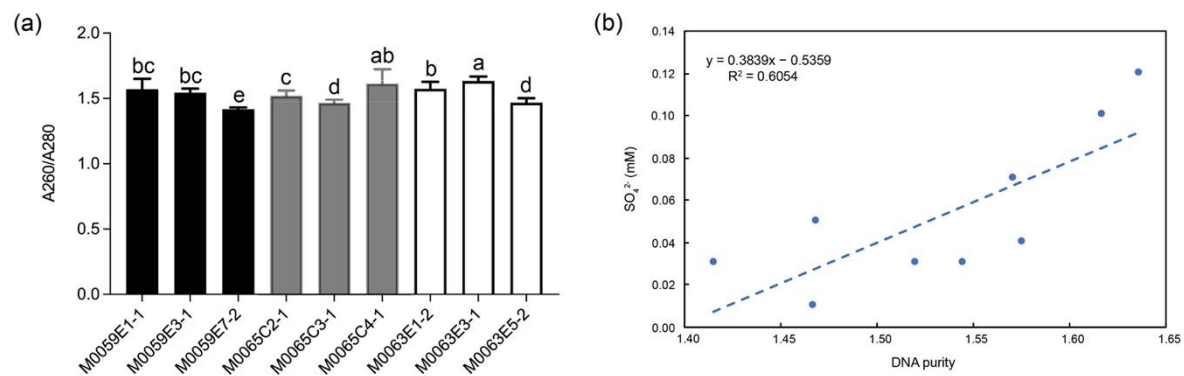

**Figure S3.** Purity of DNA recovered from sediment samples obtained at different boreholes. (a) The lines indicate the median value with the standard deviation. Black, grey and white bars represent the samples from M0059E, M0065C, and M0063E, respectively. The letters a–d indicate that there are significant differences between the samples ( $p < 0.05$ ). (b) Relationship between the  $SO_4^{2-}$  concentration and DNA purity ( $p < 0.05$  by linear regression).

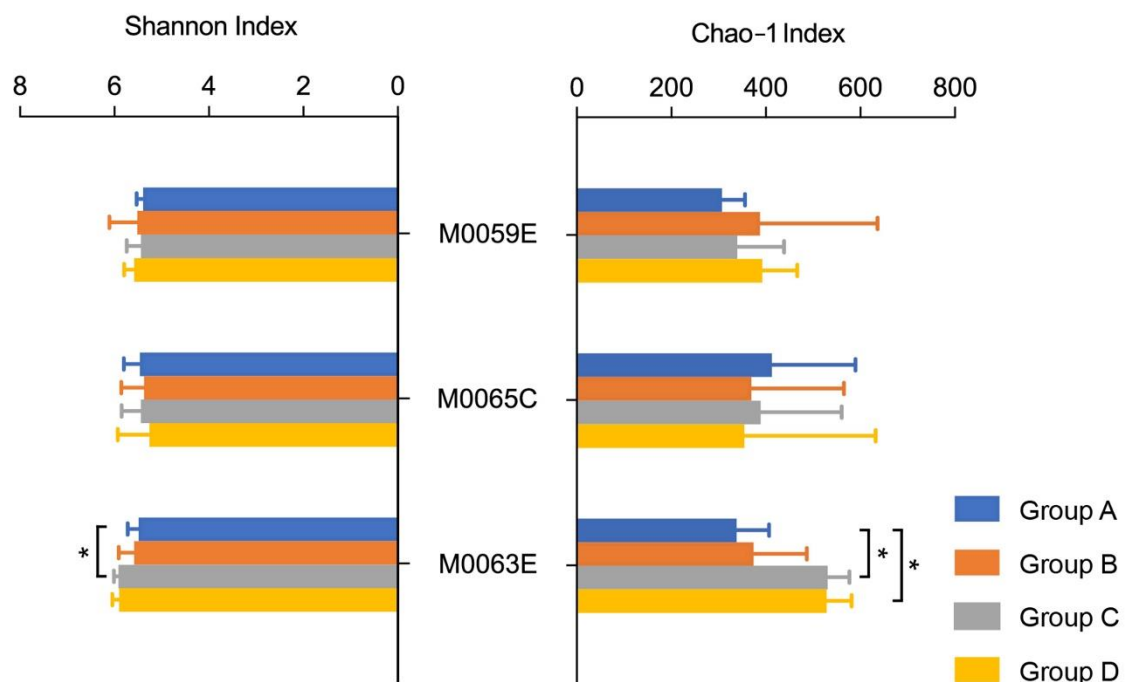

**Figure S4.** Comparison of microbial community diversity between boreholes and samples. The line indicates the median value with the standard deviation. Asterisks denote significance at  $p < 0.05$ .

## References

- Andr n, T.; J rgensen, B.B.; Cotterill, C.; Green, S.; party, the I. expedition 347 scientific IODP Expedition 347: Baltic Sea Basin Paleoenvironment and Biosphere. *Sci Drill* 2015, 20, 1–12, doi:10.5194/sd-20-1-2015.
- Cai, L.; J rgensen, B.B.; Suttle, C.A.; He, M.; Cragg, B.A.; Jiao, N.; Zhang, R. Active and Diverse Viruses Persist in the Deep Sub-Sea-floor Sediments over Thousands of Years. *Isme J* 2019, 13, 1857–1864, doi:10.1038/s41396-019-0397-9.
